# Supplementary material
Source: MDPI journal article supplement (https://www.mdpi.com/2038-8330/16/2/28)
Supplement: s1 [file s1]

# Treatment Patterns and Clinical Outcomes of Patients with Moderate to Severe Acute Graft-Versus-Host Disease: A Multicenter Chart Review Study

David Michonneau <sup>1,\*‡</sup>, Raynier Devillier <sup>2,†</sup>, Mikko Keränen <sup>3,†</sup>, Marie Thérèse Rubio <sup>4</sup>, Malin Nicklasson <sup>5</sup>, Hélène Labussière-Wallet <sup>6</sup>, Martin Carre <sup>7</sup>, Anne Huynh <sup>8</sup>, Elisabet Viayna <sup>9</sup>, Montserrat Roset <sup>9</sup>, Jonathan Finzi <sup>10</sup>, Minja Pfeiffer <sup>11</sup>, Daniel Thunström <sup>11</sup>, Núria Lara <sup>9</sup>, Lorenzo Sabatelli <sup>11</sup>, Patrice Chevallier <sup>12,‡</sup> and Maija Itälä-Remes <sup>13,‡</sup>

<sup>1</sup> Hôpital Saint-Louis, 1 Av. Claude Vellefaux, Université de Paris, 75010 Paris, France

<sup>2</sup> Institute Paoli-Calmettes, 232 Boulevard de Sainte-Marguerite, 13009 Marseille, France

<sup>3</sup> Helsinki University Hospital, Yliopistonkatu 3, P.O. Box 4, 00014 Helsinki, Finland

<sup>4</sup> Service d'Hématologie, Hôpital Brabois, Centre Hospitalier Régional Universitaire Nancy, Rue du Morvan, 54511 Vandoeuvre-les-Nancy, France

<sup>5</sup> Section of Hematology and Coagulation, Department of Specialist Medicine, Sahlgrenska University Hospital, 413 46 Gothenburg, Sweden

<sup>6</sup> Hôpital Lyon-Sud, 165 Chemin du Grand Revoyet, 69310 Pierre Bénite, France

<sup>7</sup> Centre Hospitalier Universitaire Grenoble Alpes, Av. des Maquis du Grésivaudan, 38700 La Tronche, France

<sup>8</sup> Centre Hospitalier Universitaire Toulouse, l'Institut Universitaire du Cancer de Toulouse-Oncopole, 1 Av. Irène Joliot-Curie, 31059 Toulouse, France

<sup>9</sup> IQVIA Real World Solutions, Provença 392, 3rd Floor, 08025 Barcelona, Spain

<sup>10</sup> Incyte Biosciences France, 35 Ter Avenue André Morizet, 92100 Boulogne-Billancourt, France

<sup>11</sup> Incyte Biosciences International Sàrl, Rue Docteur-Yersin 12, 1110 Morges, Switzerland

<sup>12</sup> Centre Hospitalier Universitaire Nantes, 5 allée de l'Île-Gloriette, 44000 Nantes, France

<sup>13</sup> Turku University Hospital, Kiinamylynkatu 4-8, 20521 Turku, Finland

\* Correspondence: david.michonneau@aphp.fr

† These authors contributed equally to this work and are co-lead authors.

‡ These authors contributed equally to this work and are co-senior authors.

## Contents

|                                                                                                                     |          |
|---------------------------------------------------------------------------------------------------------------------|----------|
| <b>SUPPLEMENTARY FIGURES.....</b>                                                                                   | <b>2</b> |
| Supplementary Figure S1. Comparison of (A) aGVHD Severity Grading and (B) Organ Staging Across Grading Scales ..... | 2        |
| Supplementary Figure S2. Mapping Rules for Comparing MAGIC Grading to Other Scales.....                             | 5        |
| Supplementary Figure S3. Overview of aGVHD Grading Systems.....                                                     | 6        |
| <b>SUPPLEMENTARY TABLES.....</b>                                                                                    | <b>7</b> |
| Supplementary Table S1. aGVHD Severity at Diagnosis Based on MAGIC and mGlucksberg Criteria .....                   | 7        |

## SUPPLEMENTARY FIGURES

Supplementary Figure S1 Comparison of (A) aGVHD Severity Grading and (B) Organ Staging Across Grading Scales

**A**

| MAGIC Criteria <sup>1,2</sup> |                                   | Modified Glucksberg/Keystone Criteria <sup>1,3</sup> |                                   | IBMTR Criteria <sup>4</sup> |                                       |
|-------------------------------|-----------------------------------|------------------------------------------------------|-----------------------------------|-----------------------------|---------------------------------------|
| Grade                         | Organ Involvement                 | Grade                                                | Organ Involvement                 | Grade                       | Organ Involvement                     |
| 0                             | Skin=0; liver=0; GI=0             | 0                                                    | Skin=0; liver=0; GI=0             | 0                           | Skin=0; liver=0; GI=0                 |
| I                             | Skin=1–2; liver=0; GI=0           | I                                                    | Skin=1–2; liver=0; GI=0           | A                           | Skin=1; liver=0; GI=0                 |
| II                            | Skin=3 and/or liver=1 and/or GI=1 | II                                                   | Skin=3 and/or liver=1 and/or GI=1 | B                           | Skin=2 and/or liver=1–2 and/or GI=1–2 |
| III                           | Skin=0–3; liver=2–3 and/or GI=2–3 | III                                                  | Skin=0–3; liver=2–3 and/or GI=2–4 | C                           | Skin=3 and/or liver=3 and/or GI=3     |
| IV                            | Skin=4 and/or liver=4 and/or GI=4 | IV                                                   | Skin=4 and/or liver=4; GI=0–4     | D                           | Skin=4 and/or liver=4 and/or GI=4     |

B

| MAGIC Criteria <sup>1,2</sup>                        |                                                                                        |                        |                                                                                    |                                                                                                   |
|------------------------------------------------------|----------------------------------------------------------------------------------------|------------------------|------------------------------------------------------------------------------------|---------------------------------------------------------------------------------------------------|
| Stage                                                | Skin                                                                                   | Liver                  | Upper GI                                                                           | Lower GI                                                                                          |
| 0                                                    | No rash                                                                                | Bilirubin <2 mg/dL     | No or intermittent nausea, vomiting, or anorexia                                   | Diarrhea <500 mL/d or <3 episodes/d for adults                                                    |
| 1                                                    | Maculopapular rash <25% of BSA                                                         | Bilirubin 2–3 mg/dL    | Persistent nausea, vomiting, or anorexia                                           | Diarrhea 500–999 mL/d or 3–4 episodes/d for adults                                                |
| 2                                                    | Maculopapular rash 25%–50% of BSA                                                      | Bilirubin 3.1–6 mg/dL  | NA                                                                                 | Diarrhea 1000–1500 mL/d or 5–7 episodes/d for adults                                              |
| 3                                                    | Maculopapular rash >50% of BSA                                                         | Bilirubin 6.1–15 mg/dL | NA                                                                                 | Diarrhea >1500 mL/d or >7 episodes/d for adults                                                   |
| 4                                                    | Generalized erythroderma (>50% BSA) plus bullous formation and desquamation >5% of BSA | Bilirubin >15 mg/dL    | NA                                                                                 | Severe abdominal pain with or without ileus or grossly bloody stools (regardless of stool volume) |
| Modified Glucksberg/Keystone Criteria <sup>1,3</sup> |                                                                                        |                        |                                                                                    |                                                                                                   |
| Stage                                                | Skin                                                                                   | Liver                  | Upper GI                                                                           | Lower GI                                                                                          |
| 0                                                    | No rash                                                                                | Bilirubin <2 mg/dL     | No persistent nausea and no histologic evidence of GVHD in the stomach or duodenum | Diarrhea <500 mL/d for adults                                                                     |
| 1                                                    | Rash <25% of BSA                                                                       | Bilirubin 2–3 mg/dL    | Persistent nausea with histologic evidence of GVHD in the stomach or duodenum      | Diarrhea >500 mL/d for adults or persistent nausea                                                |
| 2                                                    | Rash 25%–50% of BSA                                                                    | Bilirubin 3–6 mg/dL    | NA                                                                                 | Diarrhea >1000 mL/d for adults                                                                    |
| 3                                                    | Rash >50% of BSA                                                                       | Bilirubin 6–15 mg/dL   | NA                                                                                 | Diarrhea >1500 mL/d for adults                                                                    |
| 4                                                    | Generalized erythroderma with bullous formation                                        | Bilirubin >15 mg/dL    | NA                                                                                 | Severe abdominal pain with or without ileus                                                       |
| IBMTR Criteria <sup>4</sup>                          |                                                                                        |                        |                                                                                    |                                                                                                   |
| Stage                                                | Skin                                                                                   | Liver                  | Upper GI                                                                           | Lower GI                                                                                          |
| 0                                                    | No rash                                                                                | Bilirubin <2 mg/dL     | No persistent nausea and no histologic evidence of GVHD in the stomach or duodenum | Diarrhea <500 mL/d                                                                                |
| 1                                                    | Rash <25% of BSA                                                                       | Bilirubin 2–3 mg/dL    | Persistent nausea with histologic evidence of GVHD in the stomach or duodenum      | Diarrhea >500 mL/d                                                                                |
| 2                                                    | Rash 25%–50% of BSA                                                                    | Bilirubin 3.1–6 mg/dL  | NA                                                                                 | Diarrhea >1000 mL/d                                                                               |
| 3                                                    | Rash >50% of BSA                                                                       | Bilirubin 6.1–15 mg/dL | NA                                                                                 | Diarrhea >1500 mL/d                                                                               |
| 4                                                    | Bullae                                                                                 | Bilirubin >15 mg/dL    | NA                                                                                 | Severe pain and ileus                                                                             |

aGVHD, acute GVHD; BSA, body surface area; GI, gastrointestinal; GVHD, graft-versus-host disease; IBMTR, International Bone Marrow Transplant Registry; MAGIC, Mount Sinai Acute GVHD International Consortium; NA, not applicable.

1. Schoemans HM, et al. EBMT-NIH-CIBMTR Task Force position statement on standardized terminology & guidance for graft-versus-host disease assessment. *Bone Marrow Transplant*. 2018;53(11):1401–1415.
2. Harris AC, et al. International, multicenter standardization of acute graft-versus-host disease clinical data collection: a report from the Mount Sinai Acute GVHD International Consortium. *Biol Blood Marrow Transplant*. 2016;22:4–10.
3. Przepiorka D, et al. 1994 Consensus conference on acute GVHD grading. *Bone Marrow Transplant*. 1995;15:825–828.
4. Rowlings PA, et al. IBMTR Severity Index for grading acute graft-versus-host disease: retrospective comparison with Glucksberg grade. *Br J Haematol*. 1997;97:855–864.

Figure reproduced from Sabatelli L, Keränen M, Viayna E, et al. Burden of hospitalizations and outpatient visits associated with moderate and severe acute graft-versus-host disease in Finland and Sweden: a real-world data analysis. *Support Care Cancer*. 2022. doi: 10.1007/s00520-022-06915-9, under the terms of the Creative Commons Attribution 4.0 International License (CC BY 4.0; <https://creativecommons.org/licenses/by/4.0/>), no modifications were made.

**Supplementary Figure S2 Mapping Rules for Comparing MAGIC Grading to Other Scales**

|              | Original Glucksberg |                                           |                                                                      | Modified Glucksberg |                                           |           | IBMTR |                                           |                                |
|--------------|---------------------|-------------------------------------------|----------------------------------------------------------------------|---------------------|-------------------------------------------|-----------|-------|-------------------------------------------|--------------------------------|
| MAGIC        | Grade               | Requirements for Inclusion in MAGIC II–IV | Exclusion                                                            | Grade               | Requirements for Inclusion in MAGIC II–IV | Exclusion | Grade | Requirements for Inclusion in MAGIC II–IV | Exclusion                      |
| Grade II–IV  | 0                   | Upper GI=1                                | Upper GI=0                                                           | 0                   | NEVER                                     | ALWAYS    | –     | –                                         | –                              |
|              | I                   | Upper GI=1                                | Upper GI=0                                                           | I                   | NEVER                                     | ALWAYS    | A     | NEVER                                     | –                              |
|              | II                  | –                                         | –                                                                    | II                  | –                                         | –         | B     | Liver=1–2 and/or GI=1–2                   | B grade with only skin=2       |
|              | III                 | –                                         | –                                                                    | III                 | –                                         | –         | C     | –                                         | –                              |
|              | IV                  | –                                         | –                                                                    | IV                  | –                                         | –         | D     | –                                         | –                              |
| Grade III/IV | II                  | GI=2 and/or liver=2                       | GI=0 and liver=1<br>OR<br>GI=1 and liver=0<br>OR<br>liver=1 and GI=1 | II                  | NEVER                                     | ALWAYS    | B     | Liver=2 and/or GI=2                       | Skin=2<br>(GI ≤1 and liver ≤1) |
|              | III                 | –                                         | –                                                                    | III                 | –                                         | –         | C     | Liver=2–3 and/or GI=2–3                   | Skin=3 (GI ≤1 and liver ≤1)    |
|              | IV                  | –                                         | –                                                                    | IV                  | –                                         | –         | D     | –                                         | –                              |

GI, gastrointestinal; GVHD, graft-versus-host disease; IBMTR, International Bone Marrow Transplant Registry; MAGIC, Mount Sinai Acute GVHD International Consortium.

Figure reproduced from Sabatelli L, Keränen M, Viayna E, et al. Burden of hospitalizations and outpatient visits associated with moderate and severe acute graft-versus-host disease in Finland and Sweden: a real-world data analysis. *Support Care Cancer*. 2022. doi: 10.1007/s00520-022-06915-9, under the terms of the Creative Commons Attribution 4.0 International License (CC BY 4.0; <https://creativecommons.org/licenses/by/4.0/>), no modifications were made.

### Supplementary Figure S3 Overview of aGVHD Grading Systems

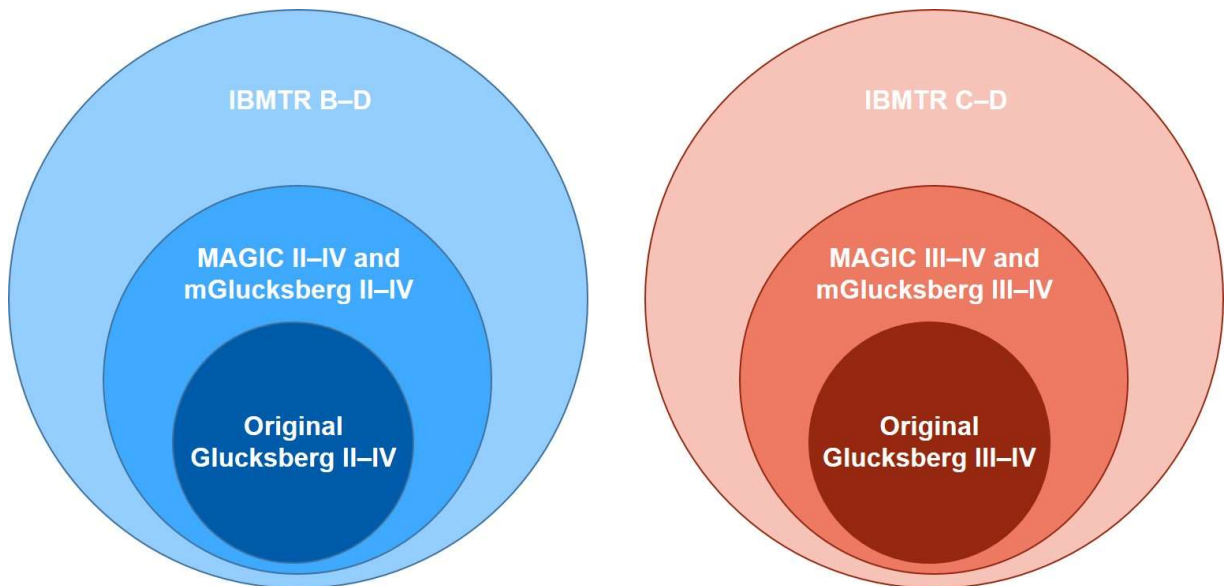

aGVHD, acute graft-versus-host disease; IBMTR, International Bone Marrow Transplant Registry; MAGIC, Mount Sinai Acute GVHD International Consortium; mGlucksberg, modified Glucksberg.

Figure reproduced from Sabatelli L, Keränen M, Viayna E, et al. Burden of hospitalizations and outpatient visits associated with moderate and severe acute graft-versus-host disease in Finland and Sweden: a real-world data analysis. *Support Care Cancer*. 2022. doi: 10.1007/s00520-022-06915-9, under the terms of the Creative Commons Attribution 4.0 International License (CC BY 4.0; <https://creativecommons.org/licenses/by/4.0/>), no modifications were made.

## SUPPLEMENTARY TABLES

**Supplementary Table S1. aGVHD Severity at Diagnosis Based on MAGIC and mGlucksberg Criteria**

| <b>Grading Scale</b>     | <b>Finland<br/>(n=45)</b> | <b>Sweden<br/>(n=10)</b> | <b>France<br/>(n=96)</b> | <b>Overall<br/>(N=151)</b> |
|--------------------------|---------------------------|--------------------------|--------------------------|----------------------------|
| MAGIC grade, n (%)       | n=25                      | n=4                      | n=0                      | n=29                       |
| I                        | 0                         | 0                        | 0                        | 0                          |
| II                       | 20 (80.0)                 | 1 (25.0)                 | 0                        | 21 (72.4)                  |
| III                      | 5 (20.0)                  | 3 (75.0)                 | 0                        | 8 (27.6)                   |
| IV                       | 0                         | 0                        | 0                        | 0                          |
| mGlucksberg grade, n (%) | n=20                      | n=6                      | n=96                     | n=122                      |
| I                        | 0                         | 0                        | 12 (12.5)                | 12 (9.8)                   |
| II                       | 13 (65.0)                 | 5 (83.3)                 | 46 (47.9)                | 64 (52.5)                  |
| III                      | 7 (35.0)                  | 0                        | 17 (17.7)                | 24 (19.7)                  |
| IV                       | 0                         | 1 (16.7)                 | 13 (13.5)                | 14 (11.5)                  |
| Unknown                  | 0                         | 0                        | 8 (8.3)                  | 8 (6.6)                    |
| Any scale, n (%)         | n=45                      | n=10                     | n=96                     | N=151                      |
| I                        | 0                         | 0                        | 12 (12.5)                | 12 (7.9)                   |
| II                       | 33 (73.3)                 | 6 (60.0)                 | 46 (47.9)                | 85 (56.3)                  |
| III                      | 12 (26.7)                 | 3 (30.0)                 | 17 (17.7)                | 32 (21.2)                  |
| IV                       | 0                         | 1 (10.0)                 | 13 (13.5)                | 14 (9.3)                   |
| Unknown                  | 0                         | 0                        | 8 (8.3)                  | 8 (5.3)                    |

aGVHD, acute graft-versus-host disease; MAGIC, Mount Sinai Acute GVHD International Consortium; mGlucksberg, modified Glucksberg.
